# Supplementary material for: Assessing cerebral blood flow, oxygenation and cytochrome c oxidase stability in preterm infants during the first 3 days after birth
Source: PubMed Central journal article supplement (PMC8741949; doi:10.1038/s41598-021-03830-7), 2022-01-07
Supplement: 41598_2021_3830_MOESM1_ESM.pdf [file 41598_2021_3830_MOESM1_ESM.pdf]

Table S1: Individual patient clinical metrics acquired on day 1

| Metric                           | P1    | P2    | P3 <sup>†</sup> | P4    | P5 <sup>‡</sup> | P6    | P7    | P8 <sup>¶</sup> |
|----------------------------------|-------|-------|-----------------|-------|-----------------|-------|-------|-----------------|
| GA (weeks)                       | 30    | 29    | 24              | 26    | 29              | 25    | 28    | 31              |
| Weight (kg)                      | 1.57  | 1.40  | 0.67            | 0.63  | 1.42            | 1.01  | 1.15  | 1.14            |
| Sex                              | M     | M     | M               | M     | M               | F     | F     | F               |
| Mode of Ventilation <sup>£</sup> | 1     | 1     | 2               | 1     | 1               | 1     | 2     | 1               |
| APGAR 5 min                      | 9     | 1     | 3               | 9     | 7               | 9     | 4     | 9               |
| APGAR 10 min                     | 9     | 7     | 7               | 9     | 9               | 9     | 7     | 9               |
| LVO (ml/kg/min)                  | 120   | 508   | 172             | 284   | 70              | 182   | 160   | -               |
| EF (%)                           | 51    | 68    | 58              | 61    | 58              | 75    | 68    | -               |
| ABP(mm Hg)                       | 68/39 | 47/25 | 34/24           | 66/47 | 60/37           | 47/24 | 75/52 | 51/19           |
| HR (bpm)                         | 160   | -     | 163             | 177   | 166             | 161   | 169   | 147             |
| RR (bpm)                         | 50    | -     | -               | 38    | 80              | 53    | 48    | 63              |
| SaO <sub>2</sub> (%)             | 98    | -     | 94              | 73    | 99              | 92    | 94    | 93              |
| Time <sub>M</sub> (hr)           | 5.5   | 4     | 18              | 2.5   | 13              | 1     | 2     | 1               |

GA: Gestational age, LVO: Left ventricular output, EF: Ejection fraction, ABP: Arterial blood pressure, HR: Heart rate, RR: Respiratory rate, SaO<sub>2</sub>: arterial saturation, Time<sub>M</sub>: Time between birth and the beginning of optical neuromonitoring.

<sup>†</sup> Grade 2 (right) intraventricular hemorrhage diagnosed by cranial ultrasound prior to optical monitoring

<sup>‡</sup> Patient with pronounced cerebral blood flow (CBF) oscillations on day 1.

<sup>¶</sup> Patient with significant correlation between CBF and the oxidation state of cytochrome c oxidase (oxCCO).

<sup>£</sup> Mode of ventilation: 1 = Non-invasive, 2 = Invasive

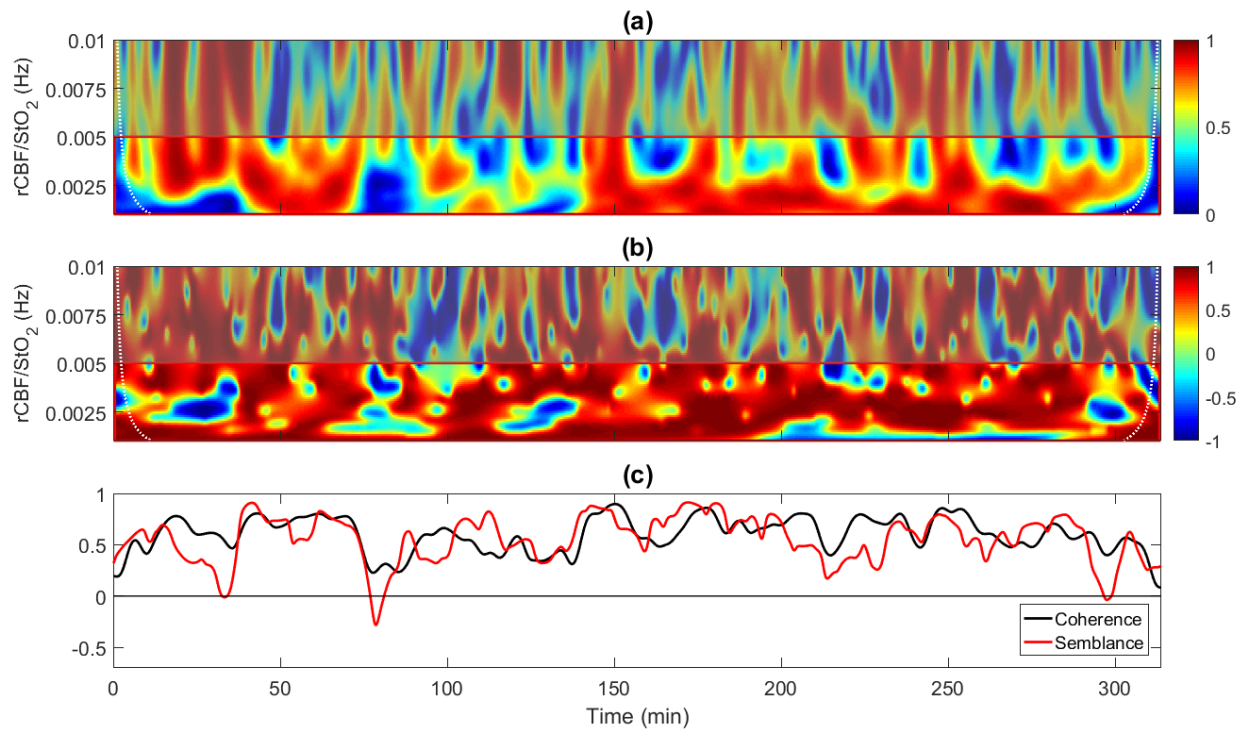

**Figure S1.** (A) Coherence between relative cerebral blood flow (rCBF) and tissue saturation (StO<sub>2</sub>) for the same patient shown in Figure 2. (B) Corresponding semblance plot. Average value was  $0.56 \pm 0.23$  in the frequency range 0.001 - 0.005 Hz (indicated by the red box). (C) Coherence (black line) and semblance (red line) time courses averaged over the frequency range 0.001 - 0.005 Hz.

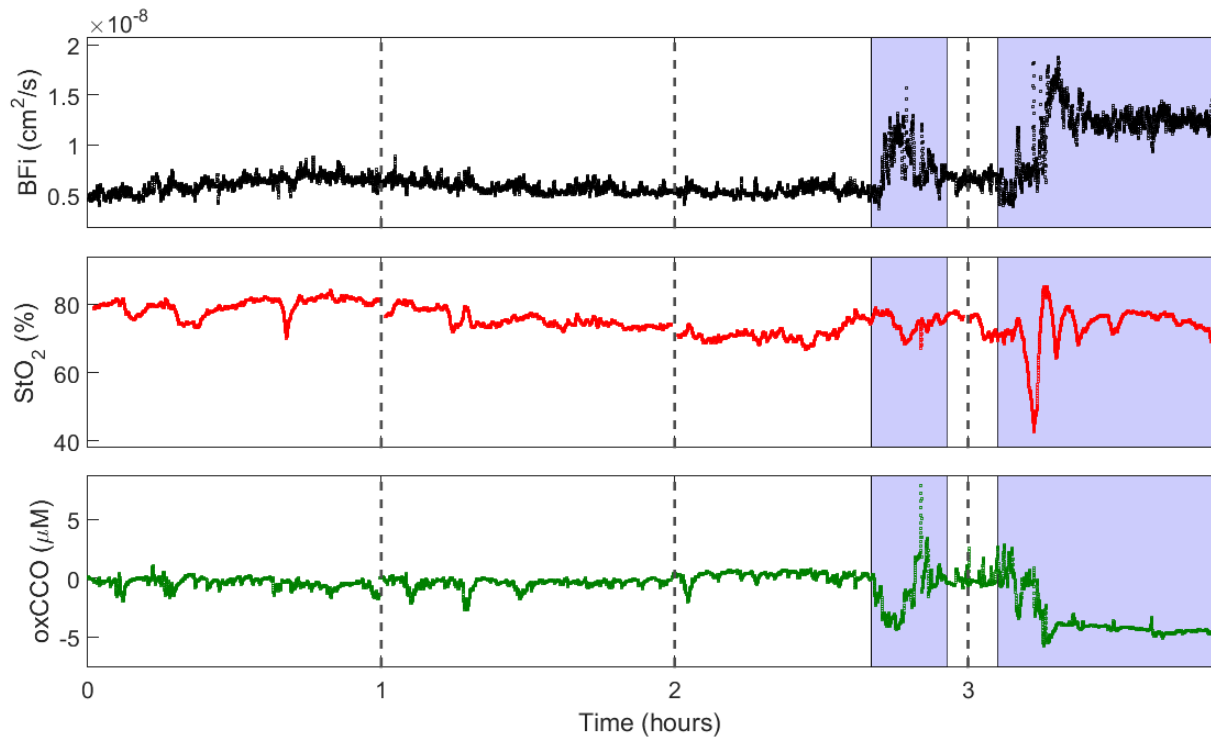

**Figure S2.** Time courses of the blood flow index (BFI), tissue saturation ( $\text{StO}_2$ ), and change in the oxidation state of cytochrome c oxidase ( $\Delta\text{oxCCO}$ ) from one patient. Vertical dashed lines indicate one-hour blocks of data that were saved individually. Shaded blue areas represents time periods identified as containing artefacts, which were subsequently removed.
